# Supplementary material for: Facile and scalable design of light-emitting and ROS-generating hybrid materials made of polyurea gels embedding a molybdenum cluster-based salt
Source: Royal Society of Chemistry journal article supplement (doi:10.1039/d1dt00962a), 2021-01-01
Supplement: d1dt00962a1.pdf [file d1dt00962a1.pdf]

## Supporting Information

Facile and scalable design of light-emitting and ROS-generating hybrid materials made of polyurea gels embedding a molybdenum cluster-based salt

*Natana A. M. de Jesus*<sup>1</sup>, *Ricardo de Oliveira*<sup>1</sup>, *Maria Amela-Cortes*<sup>2</sup>, *Noée Dumait*<sup>2</sup>,

*Stéphane Cordier*<sup>2</sup>, *Yann Molard*<sup>2\*</sup>, *Eduardo F. Molina*<sup>1\*</sup>

<sup>1</sup>*Universidade de Franca, Av. Dr. Armando Salles Oliveira 201, 14404-600 Franca, SP, Brazil*

<sup>2</sup>*UMR, Institut des Sciences Chimiques de Rennes URI-CNRS 6226, Université de Rennes 1 Campus de Beaulieu, CS 74205, F-35042 Rennes Cedex, France*

\*email: [eduardo.molina@unifran.edu.br](mailto:eduardo.molina@unifran.edu.br)

\*email: [yann.molard@univ-rennes1.fr](mailto:yann.molard@univ-rennes1.fr)

**Table S1.** Characteristics of the Hydrogen-bonded carbonyl bands in the FTIR Spectra (amide I region) of the polyurea containing different amounts of Mo cluster

| Cluster content | H-bond C=O band ( <i>d</i> ) |                           | isocyanurate ring        |                           | H-bond C=O band ( <i>d</i> ) |                           | H-bond C=O band ( <i>o</i> ) |                           |
|-----------------|------------------------------|---------------------------|--------------------------|---------------------------|------------------------------|---------------------------|------------------------------|---------------------------|
|                 | freq (cm <sup>-1</sup> )     | width (cm <sup>-1</sup> ) | freq (cm <sup>-1</sup> ) | width (cm <sup>-1</sup> ) | freq (cm <sup>-1</sup> )     | width (cm <sup>-1</sup> ) | freq (cm <sup>-1</sup> )     | width (cm <sup>-1</sup> ) |
| 0 (PUr)         | 1716                         | 16.7                      | 1689                     | 20.5                      | 1670                         | 35.4                      | 1639                         | 30.4                      |
| 1 (PUr-1)       | 1717                         | 20.7                      | 1689                     | 20.3                      | 1673                         | 31.8                      | 1643                         | 34.8                      |
| 3 (PUr-3)       | 1717                         | 18.6                      | 1689                     | 20.2                      | 1672                         | 32.5                      | 1643                         | 33.0                      |
| 5 (PUr-5)       | 1715                         | 27.5                      | 1689                     | 21.1                      | 1672                         | 33.7                      | 1643                         | 38.4                      |
| 10 (PUr-10)     | 1716                         | 18.3                      | 1689                     | 20.5                      | 1670                         | 35.5                      | 1640                         | 29.4                      |

\*d = disordered, o = ordered, width = full width measured at half-height



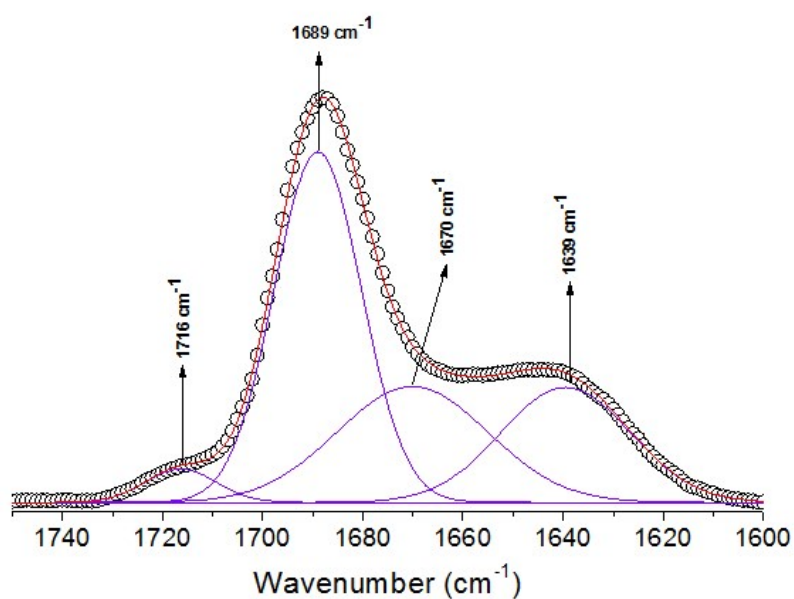

**FIGURE S1:** FTIR spectra and corresponding Gaussian curve-fits of the amide I region of unloaded polyurea-PUr.

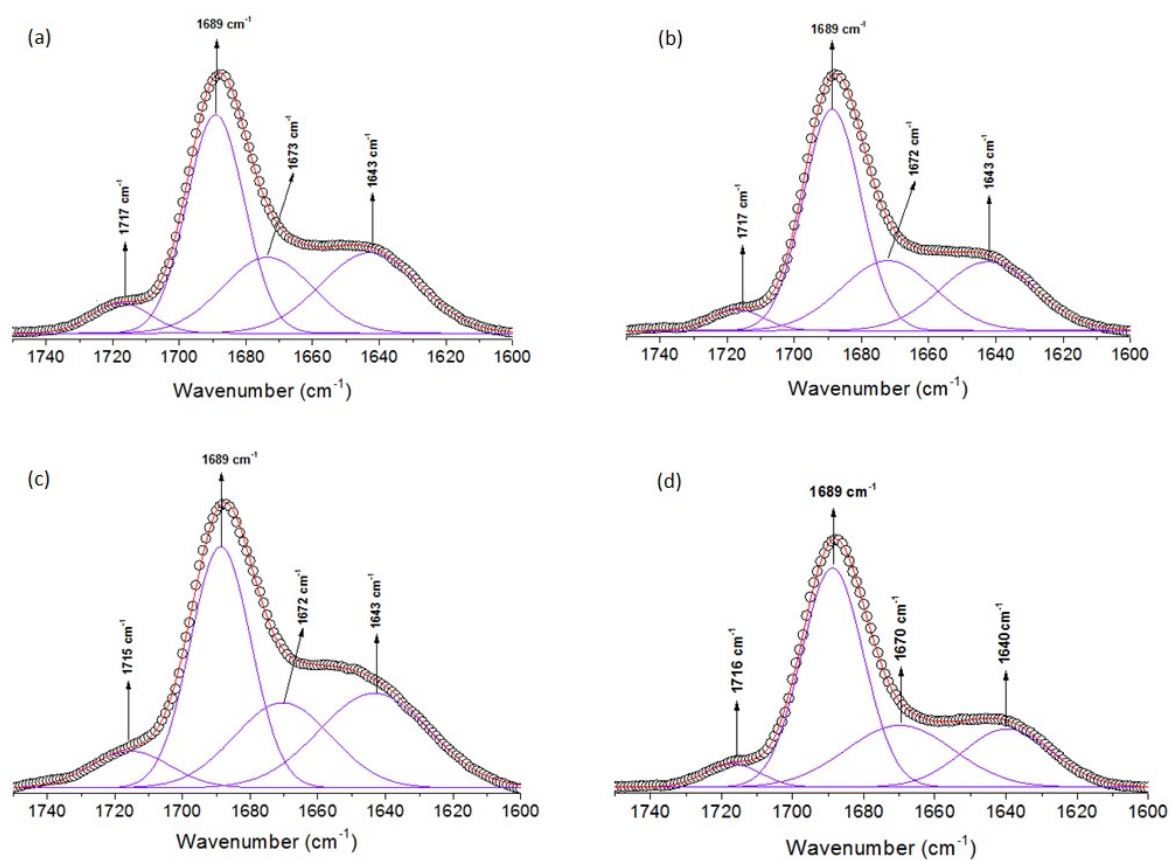

**FIGURE S2:** FTIR spectra and corresponding Gaussian curve-fits of the amide I region of loaded polyurea containing (a) 1 wt% , (b) 3 wt%, (c) 5 wt%, (d) 10 wt% of Mo cluster respectively..

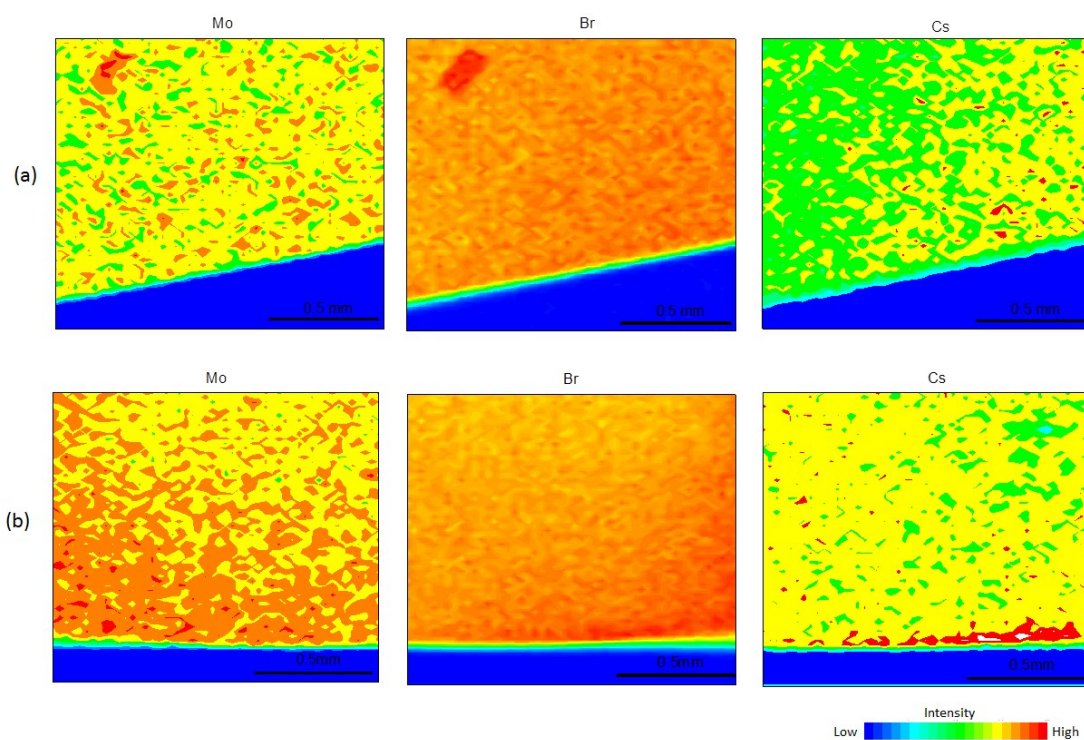

**FIGURE S3:** Intensity maps of Mo (first column), Br (second column) and Cs (third column) collected by confocal micro-X-ray fluorescence imaging for loaded PUR membrane containing (a) 3 wt% and (b) 5 wt% of  $\text{Cs}_2\text{Mo}_6\text{Br}_{14}$  cluster.

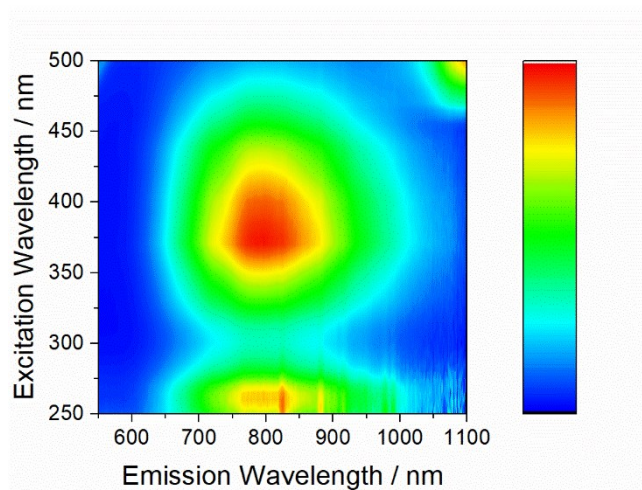

**Figure S4.** Emission vs excitation map of PUR-1

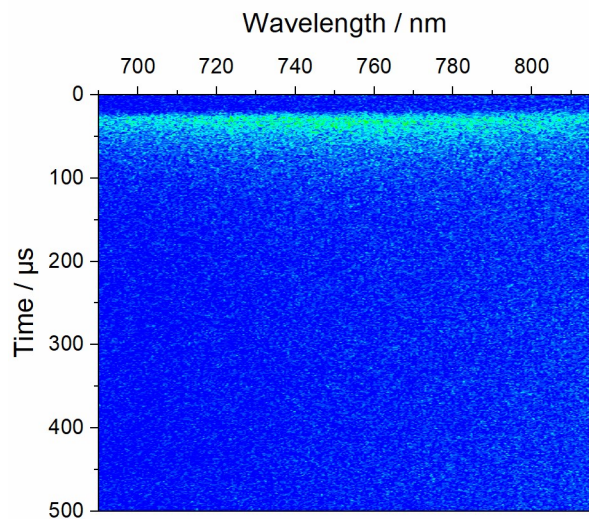

**Figure S5.** Emission decay map recorded at  $\lambda_{\text{exc}} = 375$  nm for PUr-1.

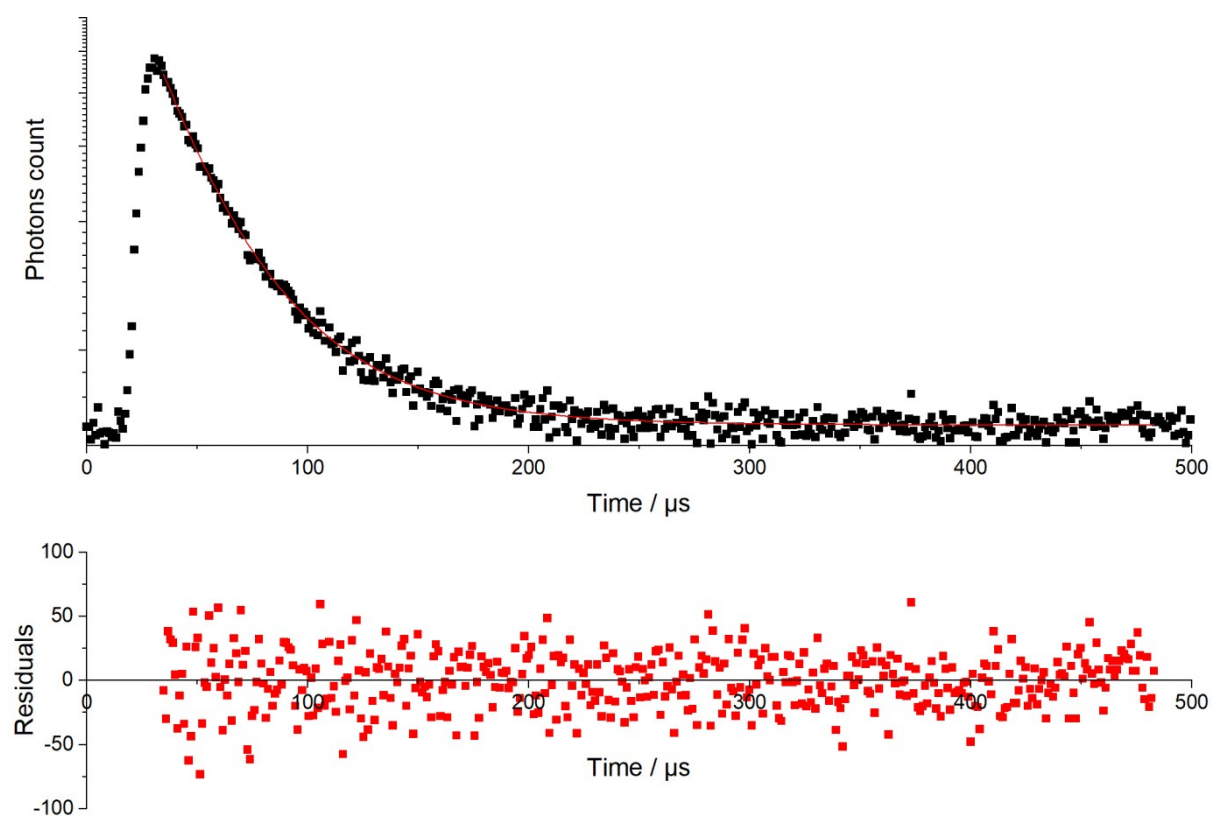

**Figure S6.** Integrated emission decay profile recorded for PUr-1 ( $\lambda_{\text{exc}} = 375$  nm) and residual plot of the calculated fit.

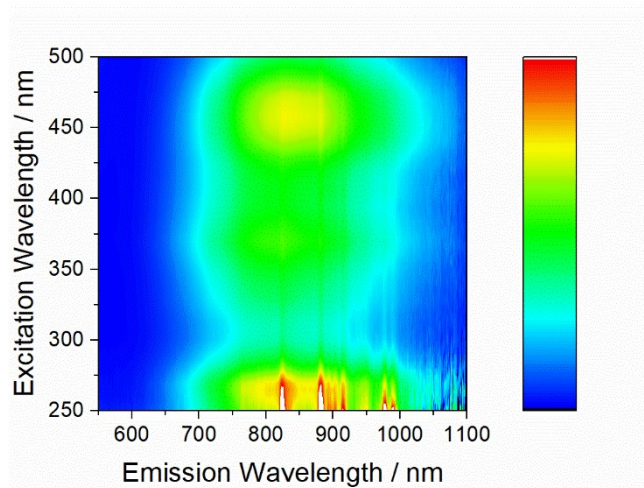

**Figure S7.** Emission vs excitation map of PUr-3.

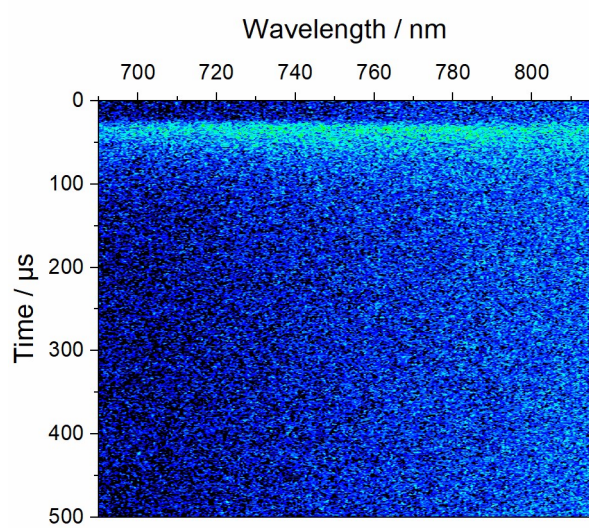

**Figure S8.** Emission decay map recorded at  $\lambda_{\text{exc}} = 375$  nm for PUr-3.

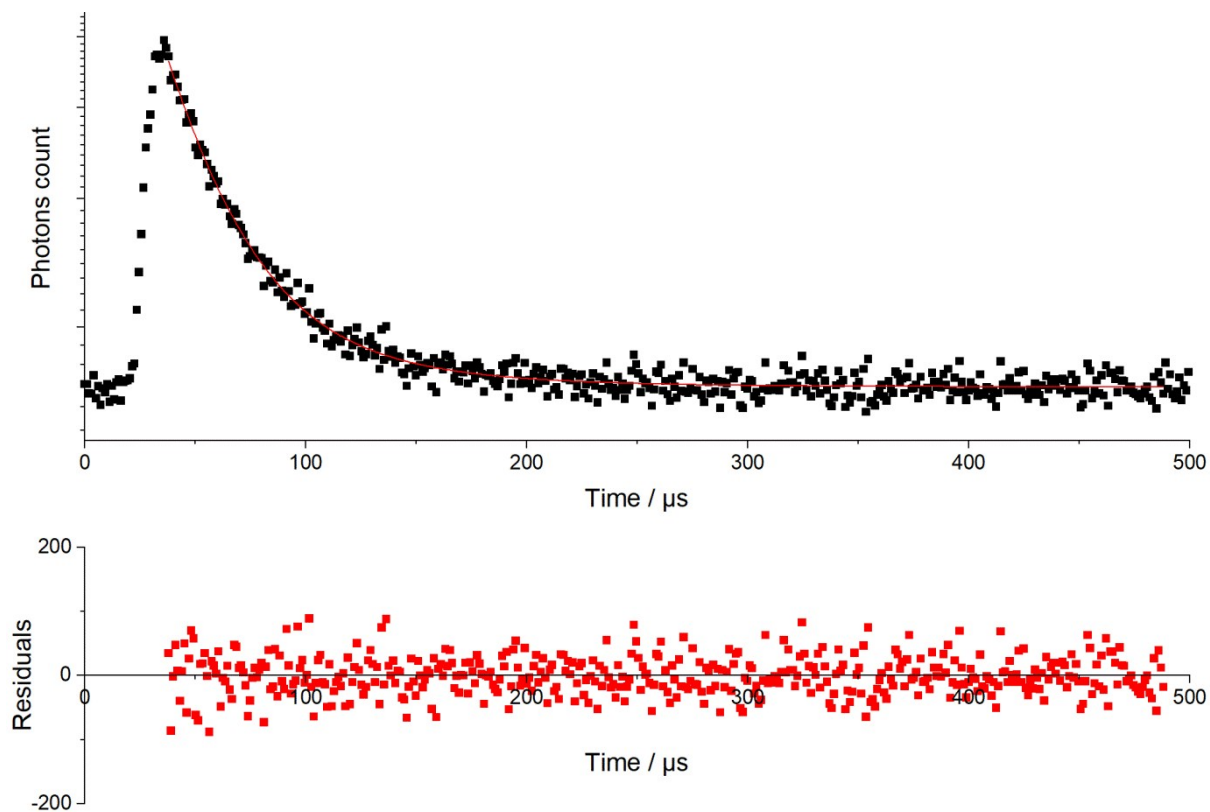

**Figure S9.** Integrated emission decay profile recorded for PUr-3 ( $\lambda_{\text{exc}} = 375 \text{ nm}$ ) and residual plot of the calculated fit.

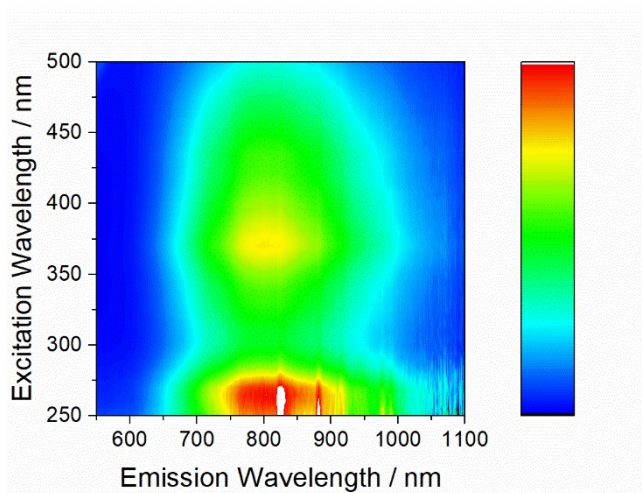

**Figure S10.** Emission vs excitation map of PUr-5.



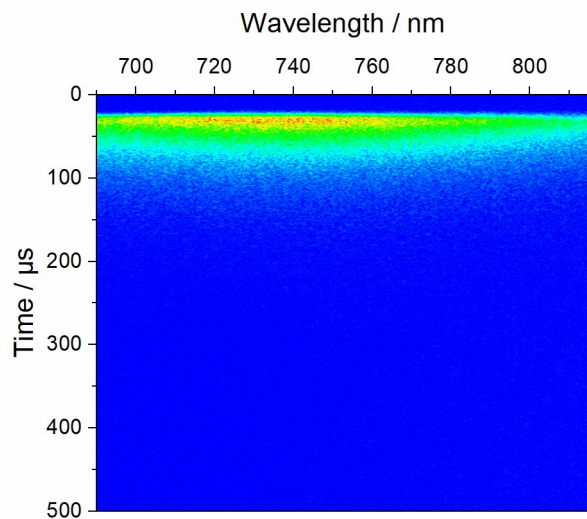

**Figure S11.** Emission decay map recorded at  $\lambda_{\text{exc}} = 375$  nm for PUr-5.

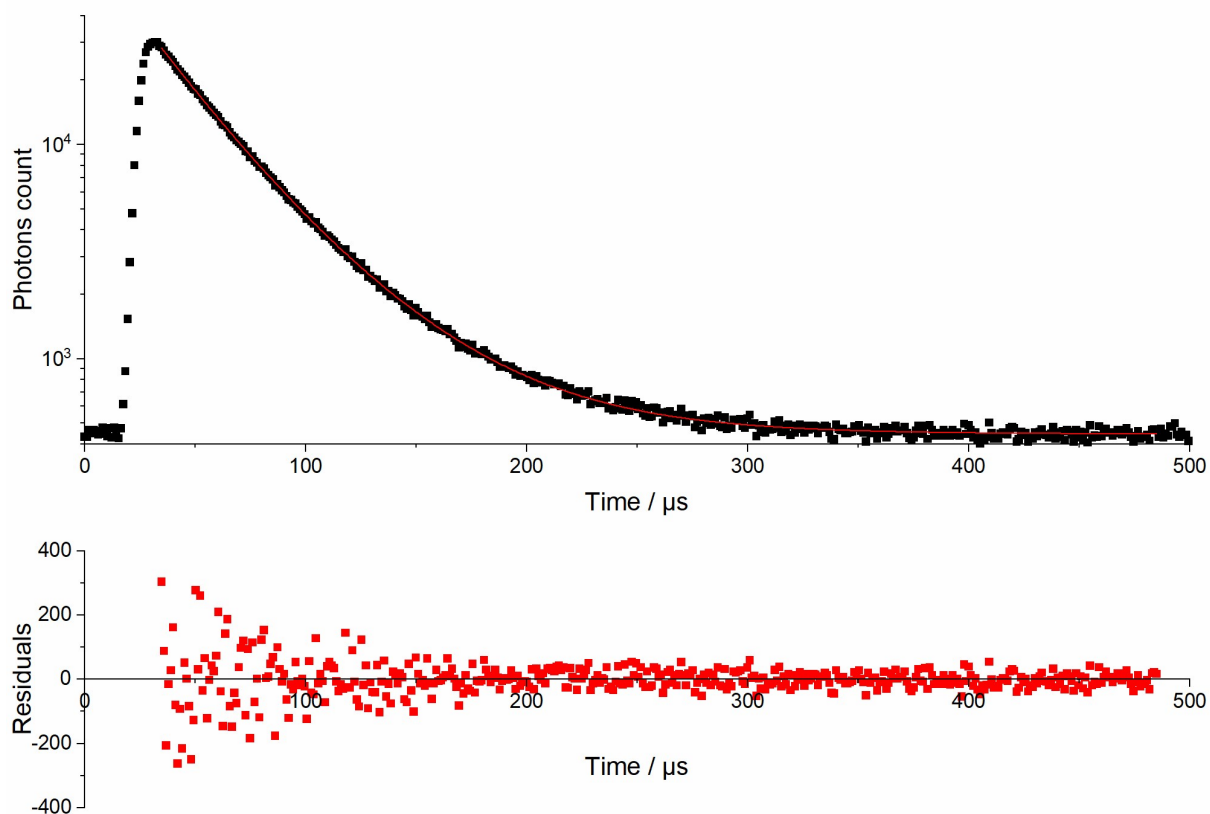

**Figure S12.** Integrated emission decay profile recorded for PUr-5 ( $\lambda_{\text{exc}} = 375$  nm) and residual plot of the calculated fit.

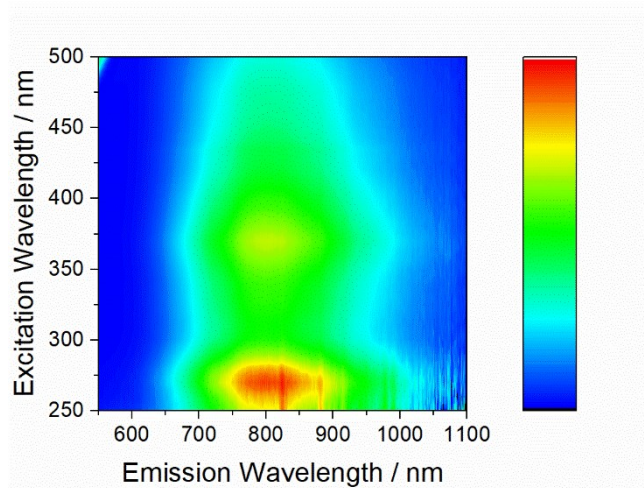

**Figure S13.** Emission vs excitation map of PUr-10.

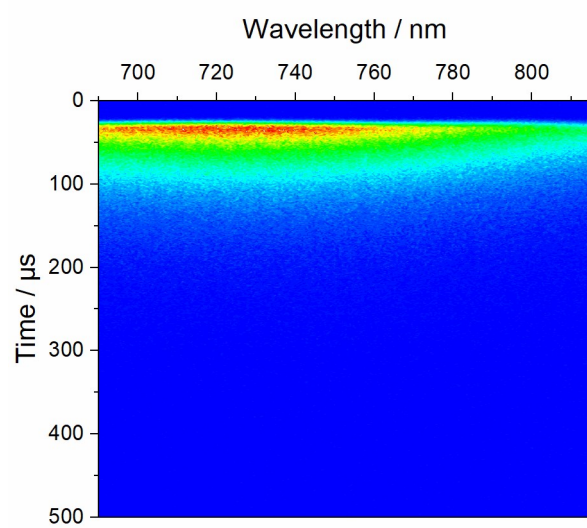

**Figure S14.** Emission decay map recorded at  $\lambda_{\text{exc}} = 375$  nm for PUr-10.

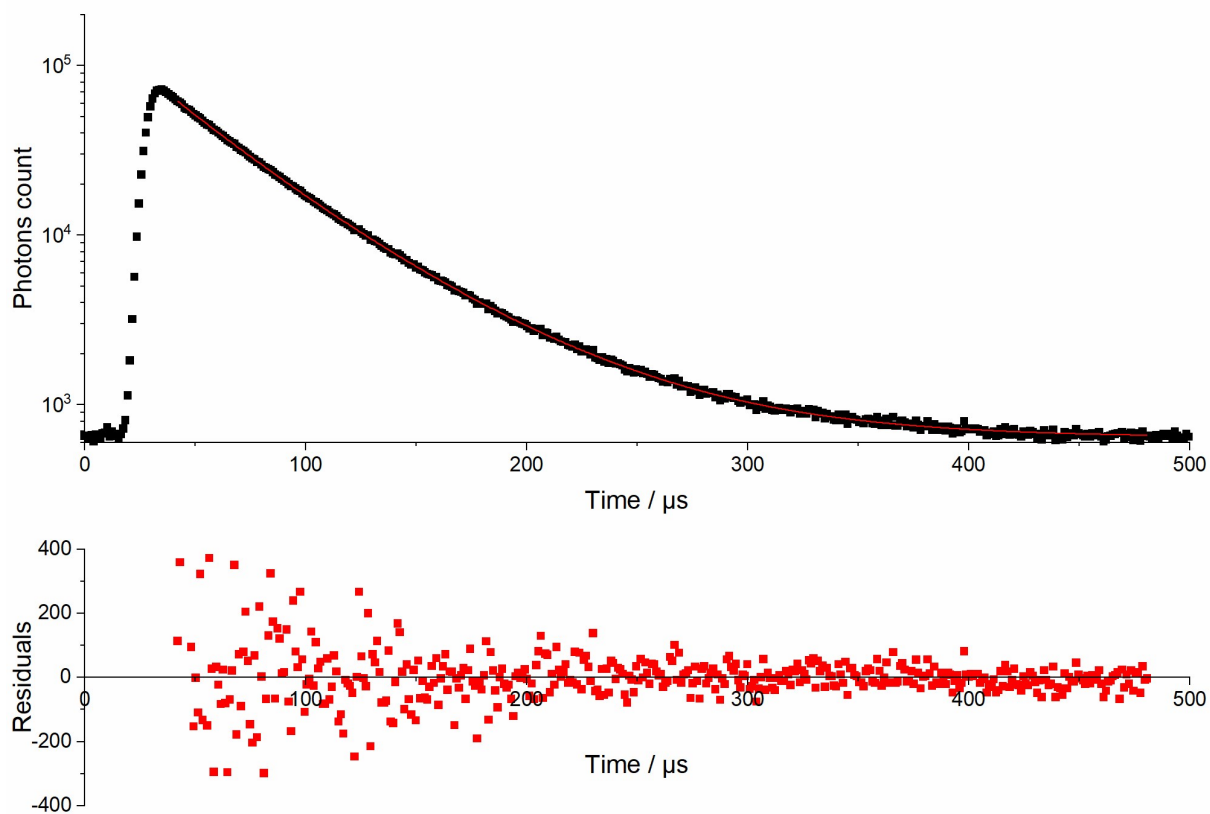

**Figure S15.** Integrated emission decay profile recorded for PUr-10 ( $\lambda_{\text{exc}} = 375$  nm) and residual plot of the calculated fit.

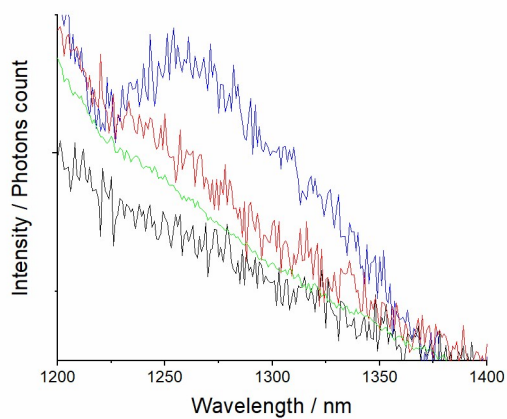

**Figure S16.**  $^1\Delta_g$  O<sub>2</sub> emission spectra observed for PUr-1 (black), PUr-3 (red), PUr-5 (green) and PUr-10 (blue) by exciting samples at 375 nm.
